# Supplementary material
Source: ML conference proceedings conference paper supplement (https://openaccess.thecvf.com/content/CVPR2023/html/Yang_RILS_Masked_Visual_CVPR_2023_paper.html)
Supplement: Supplementary file 1 [file Yang_RILS_Masked_Visual_CVPR_2023_supplemental.pdf]

# RILS: Masked Visual Reconstruction in Language Semantic Space

## A. Wall-clock Time Comparison

| Method    | Dataset   | PT Epo. | ZS.         | FT.         | Rel.GHs. |
|-----------|-----------|---------|-------------|-------------|----------|
| MAE [5]   | LAION-20M | 25      | -           | 82.1        | 1.0×     |
| CLIP [10] |           |         | 40.3        | 82.7        | 1.5×     |
| SLIP [9]  |           |         | 41.6        | 82.6        | 3.7×     |
| MAE+CLIP  |           |         | 42.3        | 82.9        | 1.8×     |
| RILS      | LAION-20M | 25      | <b>45.0</b> | <b>83.3</b> | 1.8×     |

Table S1. **Wall-clock time comparison.** We report zero-shot (ZS.) and end-to-end fine-tuning (FT.) accuracy on ImageNet-1K for reference. Rel.GHs. denotes relative GPU hours. Compared to CLIP, our method only brings 20% extra training time costs. Compared to MAE+CLIP, our method exhibits better performances under the same training overhead.

## B. Data Scaling

| Method | Dataset        | PT Epo. | ZS.  | Lin. | FT.  |
|--------|----------------|---------|------|------|------|
| RILS   | LAION-10M      | 25      | 37.5 | 68.5 | 82.7 |
|        | YFCC-15Mv2 [7] |         | 41.5 | 70.2 | 82.9 |
|        | LAION-20M      |         | 45.0 | 71.5 | 83.3 |
|        | LAION-50M      |         | 49.4 | 71.9 | 83.6 |
|        | LAION-100M     |         | 50.6 | 72.2 | 83.7 |

Table S2. **Scaling property of our RILS.** All models are pre-trained with ViT-B/16 [2] as vision encoder for 25 epochs, and report zero-shot (ZS.), linear probing (Lin.) and fine-tuning (FT.) classification accuracy on ImageNet-1K. We observe contiguous gains when our approach meets more image-text pairs. Besides, we notice that increasing data from 50M to 100M shows relatively minor improvements, we speculate this is due to only scaling dataset instead of jointly scale-up dataset with model size. We leave this exploration in the future.

## C. Implementation Details

### C.1. Model Architecture Details

|                  | Configuration | Value   |
|------------------|---------------|---------|
| Vision Encoder   | Patch Size    | 16 × 16 |
|                  | Layers        | 12      |
|                  | Width         | 768     |
|                  | Heads         | 12      |
|                  | MLP Ratio     | 4.0     |
|                  | # Parameters  | 85.8M   |
| Vision Decoder   | Layers        | 1       |
|                  | Width         | 768     |
|                  | Heads         | 12      |
|                  | MLP Ratio     | 4.0     |
|                  | # Parameters  | 8.4M    |
| Language Encoder | Layers        | 12      |
|                  | Width         | 512     |
|                  | Heads         | 8       |
|                  | MLP Ratio     | 4.0     |
|                  | # Parameters  | 37.8M   |

Table S3. **Model architecture details.**

### C.2. Pre-training

| Configuration          | Value                       |
|------------------------|-----------------------------|
| Batch Size             | 4096                        |
| Vocabulary Size        | 49408                       |
| Training Epochs        | 25                          |
| Optimizer              | AdamW [6]                   |
| Learning Rate          | 5e-4                        |
| Minimal Learning Rate  | 1e-5                        |
| Weight Decay           | 0.5                         |
| Adam $\beta_1$         | 0.9                         |
| Adam $\beta_2$         | 0.98                        |
| Warmup Epochs          | 1                           |
| Learning Rate Schedule | Cosine                      |
| Augmentation           | RandomResizedCrop(0.5, 1.0) |
| Mask Ratio             | 0.75                        |

Table S4. **Pre-training settings.**

### C.3. ImageNet-1K Fine-tuning

| Configuration          | Value               |
|------------------------|---------------------|
| Batch Size             | 1024                |
| Training Epochs        | 100                 |
| Optimizer              | AdamW [6]           |
| Learning Rate          | 4e-4                |
| Weight Decay           | 0.05                |
| Adam $\beta_1$         | 0.9                 |
| Adam $\beta_2$         | 0.999               |
| Warmup Epochs          | 5                   |
| Learning Rate Schedule | Cosine              |
| Layer-wise LR Decay    | 0.65                |
| Augmentation           | RandAug(9, 0.5) [1] |
| Label Smoothing        | 0.1                 |
| Mixup                  | 0.8                 |
| CutMix                 | 1.0                 |
| Drop Path              | 0.1                 |

Table S5. ImageNet-1K fine-tuning settings.

### C.4. Semantic Segmentation Fine-tuning

| Configuration          | Value            |
|------------------------|------------------|
| Batch Size             | 16               |
| Training Iters         | 160K             |
| Optimizer              | AdamW [6]        |
| Learning Rate          | 1e-4             |
| Weight Decay           | 0.05             |
| Adam $\beta_1$         | 0.9              |
| Adam $\beta_2$         | 0.999            |
| Warmup Iters           | 1500             |
| Learning Rate Schedule | Poly             |
| Layer-wise LR Decay    | 0.65             |
| Image Size             | 512 $\times$ 512 |

Table S6. ADE20K fine-tuning settings.

### C.5. Detection Fine-tuning

| Configuration          | COCO [8]           | LVIS [4] |
|------------------------|--------------------|----------|
| Batch Size             | 16                 |          |
| Training Epochs        | 25                 |          |
| Optimizer              | AdamW [6]          |          |
| Learning Rate          | 1e-4               | 2e-4     |
| Weight Decay           | 0.1                |          |
| Adam $\beta_1$         | 0.9                |          |
| Adam $\beta_2$         | 0.999              |          |
| Warmup Iters           | 250                |          |
| Learning Rate Schedule | Cosine             |          |
| Layer-wise LR Decay    | 0.7                |          |
| Drop Path              | 0.1                |          |
| Image Size             | 1024 $\times$ 1024 |          |
| Augmentation           | LSJ(0.1, 2.0) [3]  |          |

Table S7. COCO and LVIS fine-tuning settings.

### D. Pre-training Pseudo Code

**Algorithm 1** RILS pre-training pseudo-code in PyTorch style.

```

# xi, xt: input images and texts
# v_enc, v_dec: vision encoder, vision decoder
# l_enc: language encoder
# v_proj, l_proj: vision and language projector
# sigma, tau1, tau2: temperatures
# lambda_1, lambda_2: loss coefficients
# B, N, D: batch size, patch numbers, feature dimension

def forward(xi, xt):
    #random mask input images
    masked_xi = random_mask(xi, mask_ratio=0.75)

    zi = v_enc(xi) #[B, N, D]
    masked_zi = v_enc(masked_xi)
    gi = v_dec(masked_zi) #[B, N, D]
    zt = l_enc(xt) #[B, D]

    return forward_loss(zi, gi, zt)

def forward_loss(zi, gi, zt):
    #vision language contrastive
    ei = norm(v_proj(zi.mean(dim=1))) #[B, D]
    et = norm(l_proj(zt)) #[B, D]

    label = range(B)
    logit = ei @ et.T / sigma #[B, B]

    i2t = cross_entropy(logit, label)
    t2i = cross_entropy(logit.T, label)
    l_contra = (i2t + t2i) / 2.

    #masked visual reconstruction
    zi = norm(v_proj(zi)) #[B, N, D]
    gi = norm(v_proj(gi)) #[B, N, D]

    logit_p = (gi @ zt.T / tau1).softmax(-1) #[B, N, B]
    logit_t = (zi @ zt.T / tau2).softmax(-1) #[B, N, B]

    #reconstruction in language semantic space
    l_recon = kl_divergence(logit_p, logit_t)

    return lambda_1 * l_contra + lambda_2 * l_recon

```

### References

- [1] Ekin D Cubuk, Barret Zoph, Jonathon Shlens, and Quoc V Le. Randaugment: Practical automated data augmentation with a reduced search space. In *CVPRW*, 2020. 2
- [2] Alexey Dosovitskiy, Lucas Beyer, Alexander Kolesnikov, Dirk Weissenborn, Xiaohua Zhai, Thomas Unterthiner, Mostafa Dehghani, Matthias Minderer, Georg Heigold, Sylvain Gelly, et al. An image is worth 16x16 words: Transformers for image recognition at scale. *arXiv preprint arXiv:2010.11929*, 2020. 1
- [3] Golnaz Ghiasi, Yin Cui, Aravind Srinivas, Rui Qian, Tsung-Yi Lin, Ekin D Cubuk, Quoc V Le, and Barret Zoph. Simple copy-paste is a strong data augmentation method for instance segmentation. In *CVPR*, 2021. 2

- [4] Agrim Gupta, Piotr Dollar, and Ross Girshick. Lvis: A dataset for large vocabulary instance segmentation. In *CVPR*, 2019. [2](#)
- [5] Kaiming He, Xinlei Chen, Saining Xie, Yanghao Li, Piotr Dollár, and Ross Girshick. Masked autoencoders are scalable vision learners. In *CVPR*, 2022. [1](#)
- [6] Diederik P Kingma and Jimmy Ba. Adam: A method for stochastic optimization. *arXiv preprint arXiv:1412.6980*, 2014. [1](#), [2](#)
- [7] Yangguang Li, Feng Liang, Lichen Zhao, Yufeng Cui, Wanli Ouyang, Jing Shao, Fengwei Yu, and Junjie Yan. Supervision exists everywhere: A data efficient contrastive language-image pre-training paradigm. *arXiv preprint arXiv:2110.05208*, 2021. [1](#)
- [8] Tsung-Yi Lin, Michael Maire, Serge Belongie, James Hays, Pietro Perona, Deva Ramanan, Piotr Dollár, and C Lawrence Zitnick. Microsoft coco: Common objects in context. In *ECCV*, 2014. [2](#)
- [9] Norman Mu, Alexander Kirillov, David Wagner, and Saining Xie. Slip: Self-supervision meets language-image pre-training. In *European Conference on Computer Vision*, 2022. [1](#)
- [10] Alec Radford, Jong Wook Kim, Chris Hallacy, Aditya Ramesh, Gabriel Goh, Sandhini Agarwal, Girish Sastry, Amanda Askell, Pamela Mishkin, Jack Clark, et al. Learning transferable visual models from natural language supervision. In *ICML*, 2021. [1](#)
